# Supplementary material for: Reversal of Arterial Stiffness and Maladaptative Arterial Remodeling After Kidney Transplantation
Source: PubMed Central journal article supplement — J Am Heart Assoc. 2017 Sep 9;6(9):e006078. doi: 10.1161/JAHA.117.006078 (PMC5634273; doi:10.1161/jaha.117.006078), 2017-09-09
Supplement: JAH3-6-e006078-s001.pdf [file JAH3-6-e006078-s001.pdf]

# **SUPPLEMENTAL MATERIAL**

**Table S1.** Univariate analysis of Pulse Wave Velocity (PWV) change

| <b>Independent Variable</b>                      | <b>R</b> | <b>p</b> |
|--------------------------------------------------|----------|----------|
| <b>Recipient-related parameters</b>              |          |          |
| Recipient age                                    | 0.13     | 0.126    |
| Sex (male=1)                                     | -0.04    | 0.616    |
| Diabetes (1/0)                                   | 0.06     | 0.428    |
| Previous dyslipidemia (1/0)                      | 0.03     | 0.736    |
| Smoking (past) (1/0)                             | 0.05     | 0.561    |
| Smoking (active) (1/0)                           | 0.03     | 0.654    |
| Previous MCE (1/0)                               | -0.04    | 0.602    |
| Time on dialysis (all recipients)                | 0.18     | 0.025    |
| Time on dialysis (DD)                            | 0.07     | 0.447    |
| M3 PWV                                           | -0.33    | 0.000    |
| Delta MBP                                        | 0.24     | 0.000    |
| <b>Donor-related parameters</b>                  |          |          |
| Donor source (LD=1/DD=0)                         | -0.34    | 0.000    |
| Transplanted Kidney characteristics (ECD/SCD/LD) | -0.39    | 0.000    |
| <b>Transplantation-related parameters</b>        |          |          |
| Cold ischemia time (All recipients)              | 0.297    | 0.000    |
| Cold ischemia time (DD)                          | 0.089    | 0.352    |
| <b>Graft function parameters</b>                 |          |          |
| mGFR M12                                         | -0.079   | 0.317    |
| Log Prot/CreatU M12                              | 0.25     | 0.022    |
| <b>Main post-transplant events</b>               |          |          |
| DGF (1/0)                                        | 0.065    | 0.415    |
| BPAR (1/0)                                       | 0.067    | 0.398    |
| Delta BMI                                        | 0.093    | 0.244    |
| NODAT (1/0)                                      | 0.001    | 0.989    |

**Table S2.** Univariate analysis of Carotid Stiffness change

| <b>Independent Variable</b>                            | <b>R</b> | <b>p</b> |
|--------------------------------------------------------|----------|----------|
| <b>Recipient-related parameters</b>                    |          |          |
| Recipient age                                          | -0.00    | 0.869    |
| Sex (male=1)                                           | -0.18    | 0.025    |
| Diabetes (1/0)                                         | 0.03     | 0.682    |
| Previous dyslipidemia (1/0)                            | -0.03    | 0.705    |
| Smoking (past) (1/0)                                   | -0.09    | 0.213    |
| Smoking (active) (1/0)                                 | 0.05     | 0.556    |
| Previous MCE (1/0)                                     | 0.03     | 0.741    |
| Time on dialysis (all recipients)                      | 0.21     | 0.008    |
| Time on dialysis (DD)                                  | 0.07     | 0.447    |
| M3 carotid stiffness                                   | -0.37    | 0.000    |
| Delta MBP                                              | 0.30     | 0.000    |
| <b>Donor-related parameters</b>                        |          |          |
| Donor source (LD=1/DD=0)                               | -0.35    | 0.000    |
| Transplanted Kidney characteristics (ECD/SCD/LD)       | -0.30    | 0.000    |
| <b>Transplantation-related parameters</b>              |          |          |
| Cold ischemia time (All recipients)                    | 0.27     | 0.000    |
| Cold ischemia time (cadaveric donor kidney recipients) | 0.05     | 0.636    |
| <b>Graft function parameters</b>                       |          |          |
| mGFR M12                                               | 0.04     | 0.662    |
| Log Prot/CreatU M12                                    | 0.13     | 0.114    |
| <b>Main post-transplant events</b>                     |          |          |
| DGF (1/0)                                              | 0.03     | 0.750    |
| BPAR (1/0)                                             | 0.03     | 0.673    |
| Delta BMI                                              | 0.24     | 0.00     |
| NODM (1/0)                                             | 0.145    | 0.068    |

**Table S3.** Univariate analysis of Circumferential Wall Stress (CWS) change

| <b>Independent Variable</b>                      | <b>R</b> | <b>p</b> |
|--------------------------------------------------|----------|----------|
| <b>Recipient-related parameters</b>              |          |          |
| Recipient age                                    | 0.04     | 0.653    |
| Sex (male=1)                                     | 0.03     | 0.701    |
| Diabetes (1/0)                                   | 0.11     | 0.161    |
| Previous dyslipidemia (1/0)                      | -0.07    | 0.408    |
| Smoking (past) (1/0)                             | -0.06    | 0.432    |
| Smoking (active) (1/0)                           | 0.03     | 0.689    |
| Previous MCE (1/0)                               | 0.03     | 0.692    |
| Time on dialysis (all recipients)                | 0.24     | 0.003    |
| Time on dialysis (DD)                            | 0.13     | 0.186    |
| M3 cws                                           | -0.41    | 0.000    |
| <b>Donor-related parameters</b>                  |          |          |
| Donor source (LD=1/DD=0)                         | -0.29    | 0.000    |
| Transplanted Kidney characteristics (ECD/SCD/LD) | -0.26    | 0.000    |
| <b>Transplantation-related parameters</b>        |          |          |
| Cold ischemia time (All recipients)              | 0.19     | 0.019    |
| Cold ischemia time (DD)                          | -0.03    | 0.792    |
| <b>Graft function parameters</b>                 |          |          |
| mGFR M12                                         | -0.03    | 0.691    |
| Log Prot/CreatU M12                              | 0.07     | 0.397    |
| <b>Main post-transplant events</b>               |          |          |
| DGF (1/0)                                        | -0.02    | 0.780    |
| BPAR (1/0)                                       | -0.07    | 0.364    |
| Delta BMI                                        | 0.05     | 0.504    |
| NODM (1/0)                                       | 0.17     | 0.036    |

**Table S4.** Univariate analysis of Carotid IMT change

| <b>Independent Variable</b>                      | <b>R</b> | <b>p</b> |
|--------------------------------------------------|----------|----------|
| <b>Recipient-related parameters</b>              |          |          |
| Recipient age                                    | 0.09     | 0.271    |
| Sex (male=1)                                     | -0.11    | 0.152    |
| Diabetes (1/0)                                   | 0.00     | 0.993    |
| Previous dyslipidemia (1/0)                      | 0.07     | 0.368    |
| Smoking (past) (1/0)                             | 0.08     | 0.346    |
| Smoking (active) (1/0)                           | 0.06     | 0.481    |
| Previous MCE (1/0)                               | 0.03     | 0.702    |
| Time on dialysis (all recipients)                | -0.19    | 0.017    |
| Time on dialysis (DD)                            | -0.07    | 0.445    |
| M3 carotid IMT                                   | -0.18    | 0.025    |
| <b>Donor-related parameters</b>                  |          |          |
| Donor source (LD=1/DD=0)                         | 0.26     | 0.001    |
| Transplanted Kidney characteristics (ECD/SCD/LD) | 0.25     | 0.002    |
| <b>Transplantation-related parameters</b>        |          |          |
| Cold ischemia time (All recipients)              | -0.22    | 0.006    |
| Cold ischemia time (DD)                          | -0.10    | 0.299    |
| <b>Graft function parameters</b>                 |          |          |
| mGFR M12                                         | 0.03     | 0.747    |
| Log Prot/CreatUM12                               | 0.06     | 0.474    |
| <b>Main post-transplant events</b>               |          |          |
| DGF (1/0)                                        | 0.01     | 0.939    |
| BPAR (1/0)                                       | -0.06    | 0.431    |
| Delta BMI                                        | -0.03    | 0.675    |
| NODM (1/0)                                       | -0.117   | 0.141    |

**Table S5.** Univariate analysis of Carotid Diameter change

| <b>Independent Variable</b>                      | <b>R</b> | <b>p</b> |
|--------------------------------------------------|----------|----------|
| <b>Recipient-related parameters</b>              |          |          |
| Recipient age                                    | 0.05     | 0.569    |
| Sex (male=1)                                     | 0.02     | 0.832    |
| Diabetes (1/0)                                   | 0.18     | 0.021    |
| Previous dyslipidemia (1/0)                      | 0.03     | 0.678    |
| Smoking (past) (1/0)                             | -0.05    | 0.547    |
| Smoking (active) (1/0)                           | 0.04     | 0.584    |
| Previous MCE (1/0)                               | 0.06     | 0.468    |
| Time on dialysis (all recipients)                | 0.11     | 0.151    |
| <b>Time on dialysis (DD)</b>                     | 0.02     | 0.873    |
| M3 carotid diameter                              | -0.16    | 0.043    |
| <b>Donor-related parameters</b>                  |          |          |
| Donor source (LD=1/DD=0)                         | -0.28    | 0.000    |
| Transplanted Kidney characteristics (ECD/SCD/LD) | -0.31    | 0.000    |
| <b>Transplantation-related parameters</b>        |          |          |
| Cold ischemia time (All recipients)              | 0.24     | 0.004    |
| Cold ischemia time (DD)                          | 0.09     | 0.343    |
| <b>Graft function parameters</b>                 |          |          |
| mGFR M12                                         | -0.14    | 0.072    |
| Log Prot/CreatU M12                              | 0.02     | 0.762    |
| <b>Main post-transplant events</b>               |          |          |
| DGF (1/0)                                        | 0.01     | 0.939    |
| BPAR (1/0)                                       | -0.02    | 0.800    |
| Delta BMI                                        | 0.24     | 0.003    |
| NODM (1/0)                                       | 0.03     | 0.700    |
